# Supplementary material for: Small is beautiful? Explaining resident satisfaction in Swedish nursing home care
Source: PubMed Central journal article supplement (PMC6878673; doi:10.1186/s12913-019-4694-9), 2019-11-25

# Analysis notebook - Small is Beautiful? Explaining Resident Satisfaction in Swedish Nursing Home Care

## Contents

|                                                                 |           |
|-----------------------------------------------------------------|-----------|
| Introduction . . . . .                                          | 1         |
| Exploratory Factor analysis - Unit survey . . . . .             | 1         |
| Exploratory Factor analysis - User survey . . . . .             | 5         |
| Dropout analysis . . . . .                                      | 7         |
| Descriptive statistics (Table 1) . . . . .                      | 9         |
| Regression diagnostics . . . . .                                | 9         |
| Regression models (Figure 1) . . . . .                          | 12        |
| <b>Post-hoc analyses</b>                                        | <b>17</b> |
| Non-linear effects . . . . .                                    | 17        |
| Mediation analysis . . . . .                                    | 19        |
| Associations with size . . . . .                                | 20        |
| Associations of user questions with composite measure . . . . . | 21        |
| Sub-group analysis - Questionnaire completion . . . . .         | 22        |
| Alternate models . . . . .                                      | 23        |

## Introduction

This document provides a reproducible accounting of the steps taken to generate the results presented in the manuscript “Small is Beautiful? Explaining Resident Satisfaction in Swedish Nursing Home Care”, as well as a number of additional exploratory analyses performed to arrive at the final models presented in the paper, and post hoc analyses performed to further investigate effects identified in the main analysis.

The R code used to generate the tables, graphs, and model summaries presented here has been hidden for the sake of readability. To reproduce these results, see research data files available at <https://data.mendeley.com/datasets/y69zhgxym3/draft?a=4ca98694-31d9-4685-af93-c3f6d7d2e51d> (DOI here upon publication). In addition to the code used to generate this document, the repository also contains an interactive application which may be used to evaluate the sensitivity of our findings to alternate survey question weights. To run this application, we recommend using RStudio (<https://www.rstudio.com/>) to open *app.R* in the *sensitivity\_app* folder, and pressing the “Run App” button.

## Exploratory Factor analysis - Unit survey

Let’s examine our two nursing home-level datasets separately first to identify internal patterns. A good first step is to investigate patterns with a correlation plot. Since many of the raw continuous variables are not normally distributed, we use Spearman rank correlations to characterize associations. We’ll use complete case analysis here since we’re only looking for general patterns. Since one question was missing for all short-term service facilities, we exclude these from the analysis.

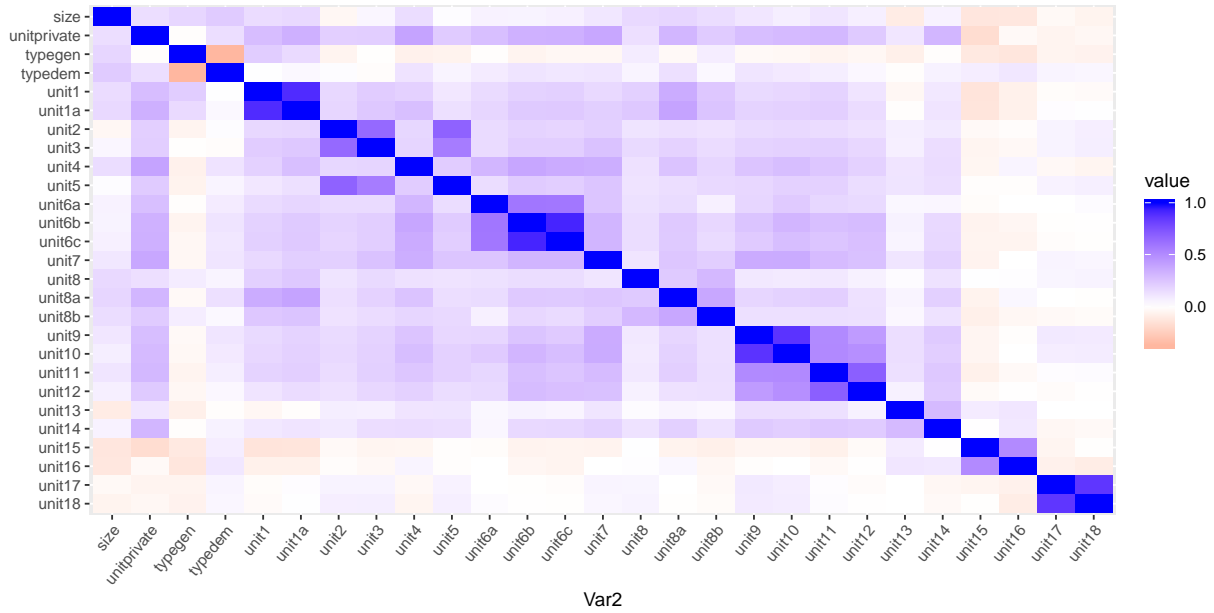

There is a lot to unpack here! Survey question descriptions may be found in a separate appendix, but generally, questions 1-7 assess for processes relating to individualized care, questions 8 and 8a-b assess for access to exercise and activities, questions 9-14 assess for processes related to patient safety, while questions 13-18 relate to staffing and education levels during the weekday and weekend.

To formalize our analysis, we performed a principal components analysis to help us decide how to proceed. Again, we use Spearman rank correlations to account for the heterogeneous distributions found in the data. We'll consider only the actual survey questions, as we have a strong theoretical basis for including the structural nursing home measures (Size, private ownership, and type of services provided) in our final analysis.

```
## [1] "Cronbachs alpha: 0.526720002433453"
```

| Factor | Eigenvalue |
|--------|------------|
| 1      | 5.1554025  |
| 2      | 2.0387944  |
| 3      | 1.9981374  |
| 4      | 1.7913008  |
| 5      | 1.7239732  |
| 6      | 1.4733257  |
| 7      | 1.1344544  |
| 8      | 1.0168535  |
| 9      | 0.8941221  |
| 10     | 0.7976697  |

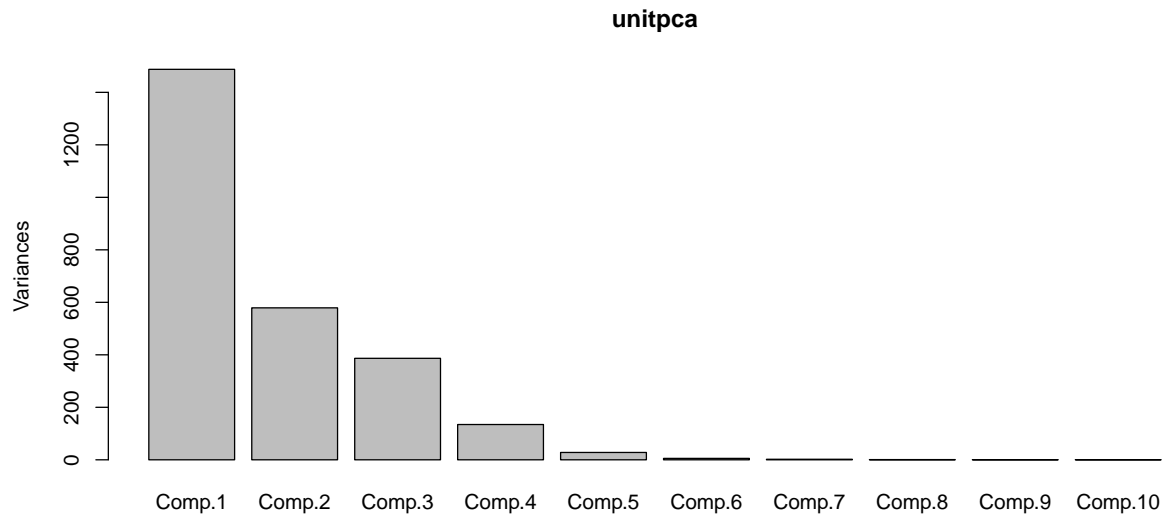

Based on the rule of thumb for an eigenvalue cutoff of 1, we find support for perhaps 7 or 8 factors in this data set, though the variance explained by these final factors becomes quite low. Let's see what a factor analysis can tell us. Note that we performed analyses using a range of rotation methods and factor counts, and readers are encouraged to experiment further with this data.

The NBHW groups these questions into 10 domains, which somewhat exceeds the number of components suggested by PCA, though we chose to retain these groups due to their conceptual value. Despite tinkering with optimization values, attempting to fit 10 factors resulted in a non-convergent model, so we present here an analysis based on 9 factors using varimax rotation.

```
##
## Call:
## factanal(x = ~., factors = 9, data = unitquestions, rotation = "varimax")
##
## Uniquenesses:
##  unit1 unit1a  unit2  unit3  unit4  unit5 unit6a unit6b unit6c  unit7
##  0.197  0.620  0.419  0.588  0.752  0.528  0.615  0.066  0.088  0.730
##  unit8 unit8a unit8b  unit9 unit10 unit11 unit12 unit13 unit14 unit15
##  0.829  0.608  0.574  0.072  0.173  0.442  0.005  0.402  0.672  0.005
## unit16 unit17 unit18
##  0.550  0.245  0.005
##
## Loadings:
##      Factor1 Factor2 Factor3 Factor4 Factor5 Factor6 Factor7 Factor8
## unit1                0.105                0.235  0.845
## unit1a  0.106                0.228  0.550
## unit2                0.749
## unit3                0.591                0.133  0.155
## unit4  0.315  0.173                0.154  0.247
## unit5  0.109                0.651                0.137
## unit6a  0.597
## unit6b  0.938  0.108                0.104  0.137
## unit6c  0.931                0.122
## unit7  0.239  0.280                0.190  0.136  0.261
## unit8                0.110                0.368  0.112
```

```

## unit8a 0.123 0.550 0.237
## unit8b 0.636
## unit9 0.119 0.926 0.180
## unit10 0.182 0.839 0.248
## unit11 0.139 0.374 0.105 0.589 0.129
## unit12 0.152 0.242 0.949
## unit13
## unit14
## unit15 0.996
## unit16 -0.116 0.655
## unit17 0.859 -0.107
## unit18 0.993
## Factor9
## unit1
## unit1a
## unit2
## unit3
## unit4 0.121
## unit5
## unit6a
## unit6b
## unit6c
## unit7
## unit8
## unit8a
## unit8b
## unit9
## unit10
## unit11 0.121
## unit12
## unit13 0.764
## unit14 0.546
## unit15
## unit16
## unit17
## unit18
##
## Factor1 Factor2 Factor3 Factor4 Factor5 Factor6 Factor7
## SS loadings 2.430 1.933 1.756 1.499 1.450 1.412 1.202
## Proportion Var 0.106 0.084 0.076 0.065 0.063 0.061 0.052
## Cumulative Var 0.106 0.190 0.266 0.331 0.394 0.456 0.508
## Factor8 Factor9
## SS loadings 1.170 0.964
## Proportion Var 0.051 0.042
## Cumulative Var 0.559 0.601
##
## Test of the hypothesis that 9 factors are sufficient.
## The chi square statistic is 236.21 on 82 degrees of freedom.
## The p-value is 0.000000000000000073

```

See appendix 2 for a description of which variables were included in which conceptual categories. Generally, the questions loaded quite well only the categories proposed by the NBHW.

## Exploratory Factor analysis - User survey

Here, we essentially redo the same steps with the user data. We'll have to exclude question 26 (who completed the questionnaire) due to the high rate of missingness (84%).

```
## [1] "Cronbachs alpha: 0.918047812530048"
```

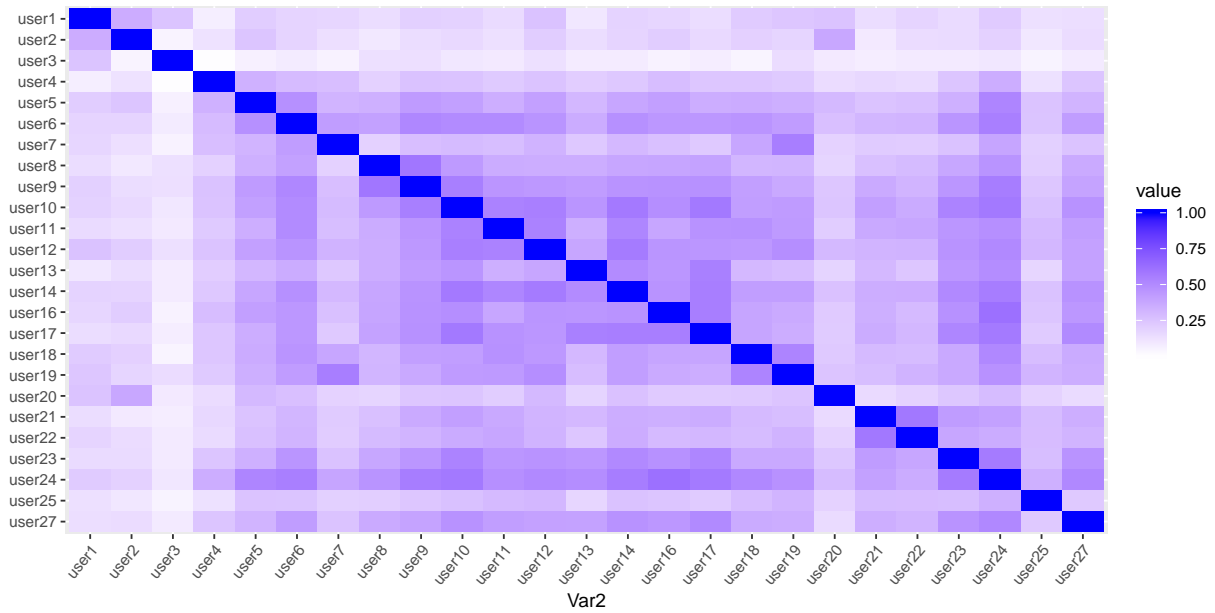

This doesn't bode well for extracting distinct factors. All the questions seem quite correlated, with only a few questions (1-3, 20, and 25) sticking out as less interrelated than the rest.

| Factor | Eigenvalue |
|--------|------------|
| 1      | 9.1431565  |
| 2      | 1.5495925  |
| 3      | 1.2163760  |
| 4      | 1.1931790  |
| 5      | 1.0536668  |
| 6      | 0.9159635  |
| 7      | 0.8437094  |
| 8      | 0.7778225  |
| 9      | 0.7330398  |
| 10     | 0.7059690  |

### userpca

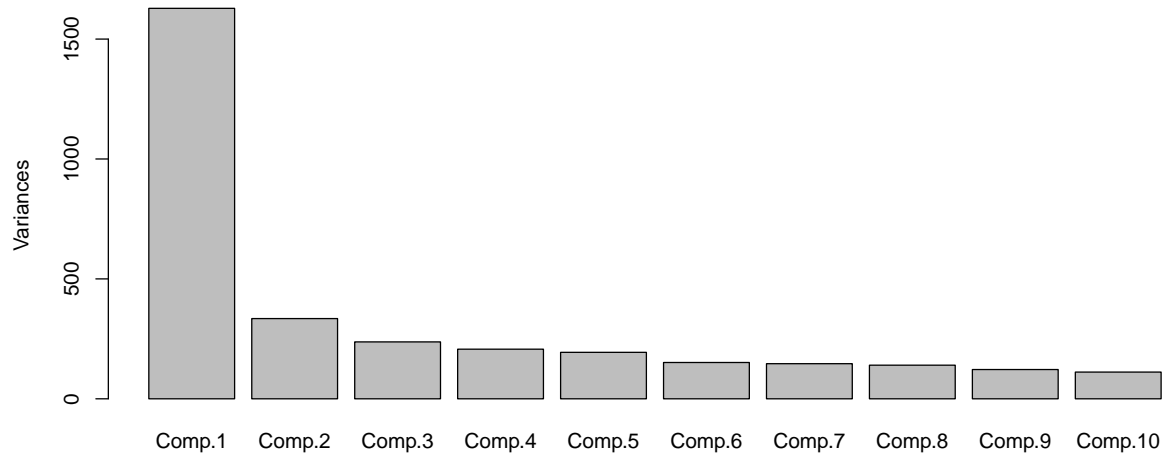

We see that the factor loadings drop quite dramatically down to just above an eigenvalue of 1. We chose to extract only 2 factors from this dataset, representing a measure of self-rated health (Questions 1-3 and 20), and an aggregate measure of satisfaction (the remainder sans question 26 which had 84% missing values). We opted to make this distinction based on theory in light of the highly colinear nature of this dataset, but for completeness, here are the factor loadings assuming 2 factors.

```
##
## Loadings:
##      Factor1 Factor2
## user1  0.110  0.362
## user2  0.116  0.292
## user3           0.157
## user4  0.311  0.281
## user5  0.426  0.428
## user6  0.497  0.491
## user7  0.162  0.617
## user8  0.533  0.231
## user9  0.616  0.331
## user10 0.688  0.350
## user11 0.506  0.424
## user12 0.509  0.487
## user13 0.666  0.134
## user14 0.656  0.339
## user16 0.652  0.281
## user17 0.762  0.186
## user18 0.366  0.571
## user19 0.261  0.713
## user20 0.199  0.364
## user21 0.449  0.259
## user22 0.376  0.313
## user23 0.669  0.257
## user24 0.696  0.422
## user25 0.268  0.338
## user27 0.613  0.234
```

```
##
##          Factor1 Factor2
## SS loadings    6.076   3.618
## Proportion Var  0.243   0.145
## Cumulative Var  0.243   0.388
```

It may be noted that these loadings are quite sensitive to changes in rotation and number of factors. It may also be noted that the overall correlations found in this survey were quite strong, as suggested by a

## Dropout analysis

Of the 2088 nursing homes in the unit survey, and the 1921 homes in the user survey, we were able to successfully match 1798 of these (86% and 93% of the homes reported in each respective dataset) to create a combined dataset. One potential source of bias is differences in variables associated with not being matched. Let's take a look at how our variables differ between matched and non-matched NHs.

First for the unit survey:

|                                       | Matched |       |        |       |         | Not Matched |       |        |       |         | U-test<br>P-value |
|---------------------------------------|---------|-------|--------|-------|---------|-------------|-------|--------|-------|---------|-------------------|
|                                       | Mean    | SD    | Median | IQR   | Missing | Mean        | SD    | Median | IQR   | Missing |                   |
| Size of nursing home                  | 43.57   | 22.70 | 39.00  | 25.00 | 6       | 18.21       | 11.72 | 16.00  | 12.00 | 1       | 0.000             |
| Private ownership per Unit Survey     | 0.19    | 0.39  | 0.00   | 0.00  | 0       | 0.14        | 0.35  | 0.00   | 0.00  | 0       | 0.049             |
| Has general care facilities           | 0.79    | 0.41  | 1.00   | 0.00  | 0       | 0.58        | 0.49  | 1.00   | 1.00  | 0       | 0.000             |
| Has dementia care facilities          | 0.59    | 0.49  | 1.00   | 1.00  | 0       | 0.53        | 0.50  | 1.00   | 1.00  | 0       | 0.064             |
| Has assisted living facilities        | 0.05    | 0.23  | 0.00   | 0.00  | 0       | 0.03        | 0.18  | 0.00   | 0.00  | 0       | 0.163             |
| Participation in resident councils    | 0.04    | 0.87  | 0.46   | 1.41  | 0       | -0.23       | 0.91  | -0.95  | 1.41  | 0       | 0.000             |
| Individualized action plans           | -0.01   | 0.92  | 0.43   | 0.92  | 0       | -0.11       | 1.05  | 0.50   | 1.34  | 0       | 0.917             |
| Patient safety routines               | 0.02    | 0.80  | -0.26  | 1.59  | 0       | -0.12       | 0.73  | -0.26  | 1.07  | 0       | 0.014             |
| Availability of exercise and activity | 0.05    | 0.81  | 0.12   | 1.48  | 0       | -0.33       | 0.90  | -0.18  | 1.10  | 0       | 0.000             |
| Care coordination routines            | 0.02    | 0.97  | -0.03  | 2.00  | 0       | -0.13       | 0.96  | -1.03  | 2.00  | 0       | 0.012             |
| Medication review routines            | 0.02    | 0.92  | 0.11   | 2.01  | 0       | -0.15       | 0.89  | -0.89  | 2.01  | 0       | 0.003             |
| Staff per resident                    | 0.29    | 0.06  | 0.28   | 0.06  | 41      | 0.31        | 0.08  | 0.30   | 0.07  | 5       | 0.000             |
| Staff with adequate education         | 83.71   | 14.12 | 86.86  | 18.54 | 40      | 82.29       | 17.19 | 85.57  | 25.14 | 5       | 0.940             |
| match                                 | 1.00    | 0.00  | 1.00   | 0.00  | 0       | 0.00        | 0.00  | 0.00   | 0.00  | 0       | 0.000             |

And then for the User survey

|                                   | Matched |      |        |      |         | Not Matched |      |        |      |         | U-test<br>P-value |
|-----------------------------------|---------|------|--------|------|---------|-------------|------|--------|------|---------|-------------------|
|                                   | Mean    | SD   | Median | IQR  | Missing | Mean        | SD   | Median | IQR  | Missing |                   |
| Response rate to User Survey      | 0.57    | 0.12 | 0.50   | 0.20 | 0       | 0.55        | 0.12 | 0.50   | 0.20 | 0       | 0.114             |
| Aggregate resident satisfaction   | 0.01    | 1.00 | 0.05   | 1.34 | 4       | -0.11       | 1.03 | -0.03  | 1.45 | 0       | 0.270             |
| Aggregate Self-Rated Health match | 0.01    | 1.00 | -0.04  | 1.31 | 12      | -0.18       | 1.03 | -0.24  | 1.34 | 3       | 0.036             |
|                                   | 1.00    | 0.00 | 1.00   | 0.00 | 0       | 0.00        | 0.00 | 0.00   | 0.00 | 0       | 0.000             |

It appears that non-matched nursing homes are quite a bit smaller than matched homes, score quite a bit lower on process-related measures, and have fewer opportunities for physical activity. In terms of the satisfaction survey, We find that non-matched homes have perhaps slightly lower self-rated health and satisfaction than their matched counterparts. As demonstrated using Mann-Whitney U tests, several differences in the Unit survey items noted here are significant, while only the self rated health variable in the user survey may be shown to differ significantly between matched and non-matched nursing homes.

Another source of missingness in this data is non-response to the user survey. To investigate potential biases caused by non-response, a model was specified to identify variables associated with the survey response rate. Note that while these data were presented in binned form (i.e. response rates between 0% - 40% were grouped together), we used a linear model as these respresented an underlying continuous and apparently normal distribution.

|                                                     | Estimate | 2.5 %  | 97.5 % |
|-----------------------------------------------------|----------|--------|--------|
| Intercept                                           | -0.021   | -0.085 | 0.042  |
| Aggregate resident satisfaction                     | 0.136    | 0.084  | 0.186  |
| Participation in resident councils                  | 0.034    | -0.021 | 0.086  |
| Individualized action plans                         | 0.041    | -0.013 | 0.100  |
| Meal-related routines and plans                     | -0.012   | -0.068 | 0.048  |
| Patient safety routines                             | 0.005    | -0.052 | 0.062  |
| Care coordination routines                          | -0.015   | -0.081 | 0.046  |
| Medication review routines                          | -0.016   | -0.077 | 0.042  |
| Availability of exercise and activity               | 0.039    | -0.019 | 0.097  |
| Size of nursing home                                | -0.136   | -0.189 | -0.082 |
| Private ownership                                   | 0.071    | 0.015  | 0.126  |
| Nurses per resident                                 | -0.005   | -0.055 | 0.048  |
| Staff per resident                                  | -0.028   | -0.076 | 0.026  |
| Staff with adequate education                       | -0.026   | -0.075 | 0.027  |
| Has general care facilities                         | 0.136    | 0.083  | 0.190  |
| Has dementia care facilities                        | -0.104   | -0.159 | -0.056 |
| Has assisted living facilities                      | 0.100    | 0.028  | 0.178  |
| Aggregate Self-Rated Health                         | 0.015    | -0.035 | 0.068  |
| Population 65+ in Nursing Home (%)                  | -0.033   | -0.104 | 0.038  |
| Population 65+ (%)                                  | -0.118   | -0.198 | -0.049 |
| Population per square kilometer                     | -0.083   | -0.174 | 0.029  |
| Average annual cost per resident (SEK)              | -0.045   | -0.107 | 0.024  |
| Average age of residents in nursing homes           | 0.049    | -0.011 | 0.109  |
| Political control (left = -1, mixed = 0, right = 1) | -0.001   | -0.075 | 0.077  |
| Average annual per capita taxable income (SEK)      | 0.036    | -0.039 | 0.106  |



We find that among the variables we are interested in estimating, response rates are associated with resident satisfaction, negatively associated with nursing home size, and positively associated with private ownership of the nursing homes. The implications of these findings are discussed in the manuscript.

## Descriptive statistics (Table 1)

Now that we have a grip on these datasets, lets take a look at our combined dataset. Let's begin with some descriptive data for the aggregated measures which we developed based on our exploratory analysis. This is Table 1 in the manuscript

|                                                     | Mean      | SD        | Median    | IQR       | Missing |
|-----------------------------------------------------|-----------|-----------|-----------|-----------|---------|
| Aggregate resident satisfaction                     | 0.01      | 1.00      | 0.05      | 1.34      | 4       |
| Participation in resident councils                  | 0.00      | 1.00      | 0.48      | 1.63      | 0       |
| Individualized action plans                         | 0.00      | 1.00      | 0.48      | 1.00      | 0       |
| Meal-related routines and plans                     | 0.00      | 1.00      | -0.17     | 1.60      | 53      |
| Patient safety routines                             | 0.00      | 1.00      | -0.35     | 1.98      | 0       |
| Care coordination routines                          | 0.00      | 1.00      | -0.05     | 2.07      | 0       |
| Medication review routines                          | 0.00      | 1.00      | 0.09      | 2.18      | 0       |
| Availability of exercise and activity               | 0.00      | 1.00      | 0.08      | 1.82      | 0       |
| Private ownership                                   | 0.19      | 0.39      | 0.00      | 0.00      | 1       |
| Size of nursing home                                | 43.57     | 22.70     | 39.00     | 25.00     | 6       |
| Nurses per resident                                 | 0.03      | 0.01      | 0.03      | 0.02      | 62      |
| Staff per resident                                  | 0.29      | 0.06      | 0.28      | 0.06      | 41      |
| Staff with adequate education                       | 83.71     | 14.12     | 86.86     | 18.54     | 40      |
| Has general care facilities                         | 0.79      | 0.41      | 1.00      | 0.00      | 0       |
| Has dementia care facilities                        | 0.59      | 0.49      | 1.00      | 1.00      | 0       |
| Has assisted living facilities                      | 0.05      | 0.23      | 0.00      | 0.00      | 0       |
| Aggregate Self-Rated Health                         | 0.01      | 1.00      | -0.04     | 1.31      | 12      |
| Population 65+ in Nursing Home (%)                  | 4.21      | 0.88      | 4.21      | 0.99      | 19      |
| Population 65+ (%)                                  | 21.22     | 4.19      | 21.20     | 6.33      | 0       |
| Population per square kilometer                     | 472.49    | 1164.71   | 60.62     | 116.03    | 0       |
| Average annual cost per resident (SEK)              | 838285.24 | 161812.23 | 822686.24 | 117267.27 | 19      |
| Average age of residents in nursing homes           | 83.49     | 1.82      | 83.60     | 2.30      | 0       |
| Political control (left = -1, mixed = 0, right = 1) | -0.12     | 0.80      | 0.00      | 2.00      | 0       |
| Average annual per capita taxable income (SEK)      | 188232.40 | 24921.26  | 183269.64 | 23691.47  | 0       |

## Regression diagnostics

Let's first check some model assumptions for a simple linear regression consisting of all our predictor variables. While we'll be using a few different models in our analysis, this should give us a good picture of what to look out for.

QQ-plot of residuals

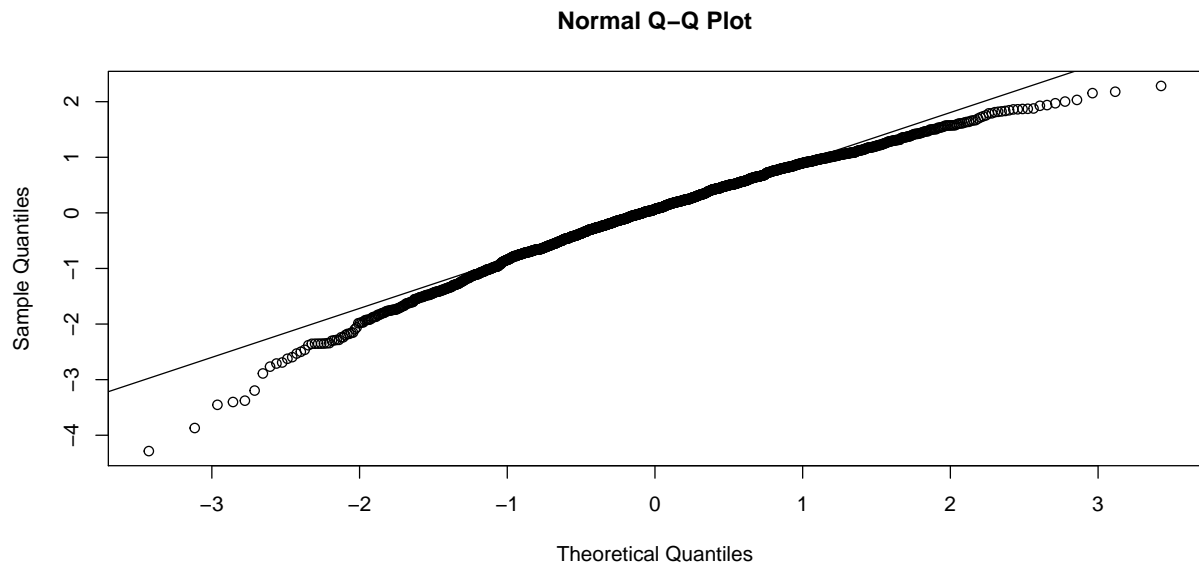

Plot of residuals v. fitted values

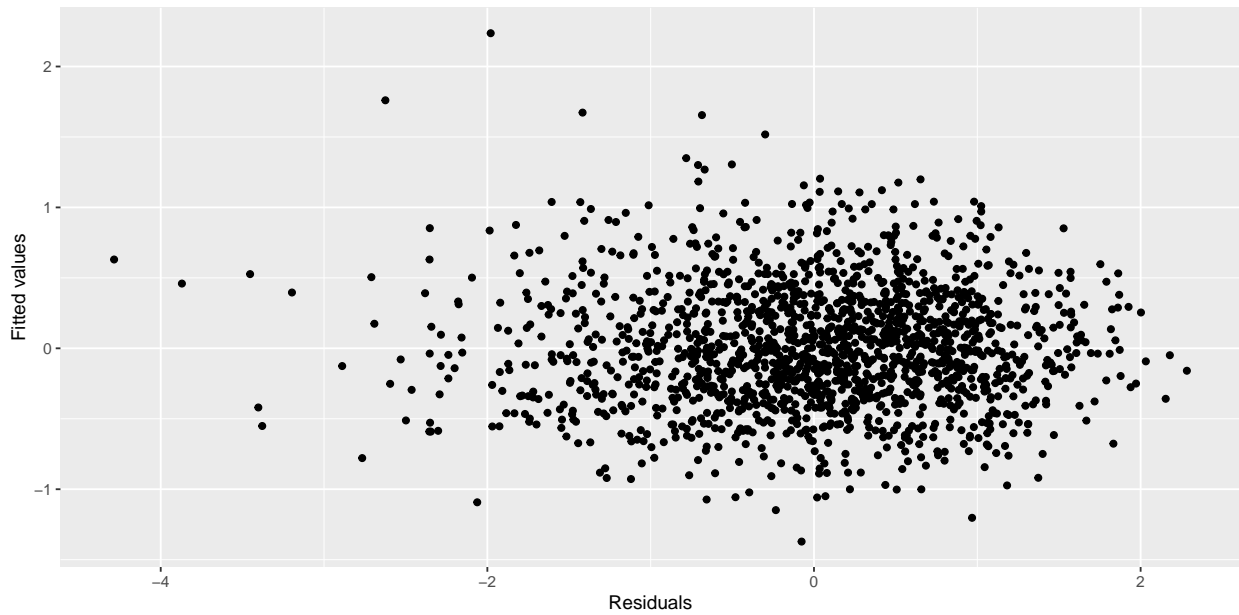

Breusch-Pagan test of heteroskedasticity:

```
##
## studentized Breusch-Pagan test
##
## data:  lmfit
## BP = 33.613, df = 16, p-value = 0.006123
```

Variable Inflation Factors:

```
## residentcouncil    actionplan        meals    safetyroutines
##      1.269672        1.318307        1.604375        1.507199
```

```
##      carecoord      medreview      activity      private
##      1.524005      1.464741      1.290086      1.445695
##      size          rns          staff          edu
##      1.122483      1.061378      1.049314      1.041220
##      typegen      typedem      typeserv      srhtot
##      1.208869      1.233964      1.035926      1.019041
```

Bootstrap validation results:

```
##      index.orig training  test optimism index.corrected  n
## R-square      0.1898  0.1970  0.1810  0.0160      0.1737 200
## MSE          0.8069  0.8021  0.8157 -0.0135      0.8204 200
## g            0.4860  0.4958  0.4766  0.0192      0.4668 200
## Intercept    0.0000  0.0000  0.0014 -0.0014      0.0014 200
## Slope        1.0000  1.0000  0.9637  0.0363      0.9637 200
```

While we don't seem to have problems with overfitting, we do have some outliers which could affect inferences in a linear model assuming normally distributed residuals. While multicollinearity is below typically accepted thresholds, for some of the process measures, the variable inflation factor is high enough that it could cast some doubt on the interpretation of our results. To avoid this, we'll estimate each predictor variable independently.

Our model also has some trouble with heteroskedasticity per the Breusch-Pagan test, and a visual inspection of residuals reveals some potential influential outliers. It seems likely that this is due to the skew in outcome data, and as such is likely to be an issue in more restricted models as well. To deal with this, we chose to use the Huber-White sandwich estimator to provide consistent coefficient estimates..

Next, let's take a look at our heirachial models. We developed our models based on theory, and we're primarily interested in estimating fixed effects, but getting a sense of inter- and intra- municipality variation is quite interesting, and it's always a good idea to verify that the variables we're adding actually contribute to a good model fit.

Check intra-class correlation:

```
## # Intraclass Correlation Coefficient
##
##      Adjusted ICC: 0.100
##      Conditional ICC: 0.100
```

ANOVA test to check for model superiority:

```
## Data: compaggdata
## Models:
## mlnull: sattot ~ 1 + (1 | munin)
## mlnh:  sattot ~ residentcouncil + actionplan + meals + safetyroutines +
## mlnh:      carecoord + medreview + activity + private + size + rns +
## mlnh:      staff + edu + typegen + typedem + typeserv + srhtot + (1 |
## mlnh:      munin)
##      Df      AIC      BIC  logLik deviance Chisq Chi Df
## mlnull  3 4481.4 4497.5 -2237.7  4475.4
## mlnh   19 4181.6 4283.8 -2071.8  4143.6 331.8   16
##      Pr(>Chisq)
## mlnull
## mlnh  < 0.00000000000000022 ***
## ---
## Signif. codes:  0 '***' 0.001 '**' 0.01 '*' 0.05 '.' 0.1 ' ' 1

## Data: compaggdata
## Models:
## mlnh:  sattot ~ residentcouncil + actionplan + meals + safetyroutines +
```

```
## mlnh:      carecoord + medreview + activity + private + size + rns +
## mlnh:      staff + edu + typegen + typedem + typeserv + srhtot + (1 |
## mlnh:      munin)
## mlnhmuni: sattot ~ residentcouncil + actionplan + meals + safetyroutines +
## mlnhmuni:      carecoord + medreview + activity + private + size + rns +
## mlnhmuni:      staff + edu + typegen + typedem + typeserv + srhtot + pop65innh +
## mlnhmuni:      pop65 + popkm + costperpt + nhage + polcontrol + taxpower +
## mlnhmuni:      (1 | munin)
##          Df    AIC    BIC  logLik deviance  Chisq Chi Df  Pr(>Chisq)
## mlnh      19 4181.6 4283.8 -2071.8   4143.6
## mlnhmuni  26 4156.1 4295.9 -2052.1   4104.1 39.487      7 0.000001577 ***
## ---
## Signif. codes:  0 '***' 0.001 '**' 0.01 '*' 0.05 '.' 0.1 ' ' 1
```

QQ plot of random effect residuals:

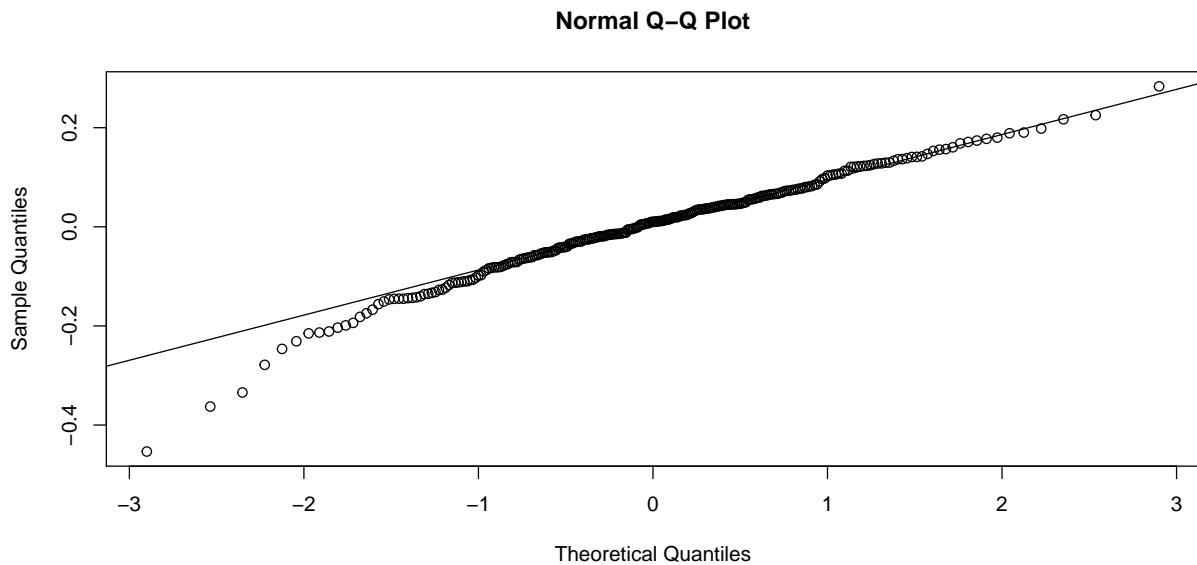

We can interpret the ICC as indicating that 9.9% of the variation in satisfaction occurs at the municipality level. Based on ANOVA results, we find that including both the nursing home level and municipality level fixed effects contribute to a good model fit. Note that while we tried fitting some models with random slopes as well, many municipalities lack a sufficient sample size for this approach to (in our attempts) produce reliable results. We see that there is some deviation from normality in the sparse lower quantiles, but this seems close enough to generate valid inferences, especially given the use of bootstrapping to generate confidence intervals.

### Regression models (Figure 1)

Let's go ahead and print each of the coefficient estimates reported in figure 1, and construct the figure included in the article:

| fw | var | group | type | Bivariate | Health controlled | Health and Structure controlled |
|----|-----|-------|------|-----------|-------------------|---------------------------------|
|----|-----|-------|------|-----------|-------------------|---------------------------------|

|                                        |                                             |                        |                        |                                |                                |                                |
|----------------------------------------|---------------------------------------------|------------------------|------------------------|--------------------------------|--------------------------------|--------------------------------|
| 1a -<br>Classical<br>OLS<br>Regression | Participation<br>in resident<br>councils    | Individualized<br>care | Processual<br>measures | 0.051 (0.004<br>- 0.097)       | 0.031 (-0.013<br>- 0.074)      | 0.048 (0.003<br>- 0.094)       |
| 1a -<br>Classical<br>OLS<br>Regression | Individualized<br>action plans              | Individualized<br>care | Processual<br>measures | 0.067 (0.016<br>- 0.117)       | 0.077 (0.032<br>- 0.123)       | 0.074 (0.027<br>- 0.122)       |
| 1a -<br>Classical<br>OLS<br>Regression | Meal-related<br>routines and<br>plans       | Individualized<br>care | Processual<br>measures | 0.046 (-0.005<br>- 0.096)      | 0.048 (0.001<br>- 0.095)       | 0.043 (-0.008<br>- 0.094)      |
| 1a -<br>Classical<br>OLS<br>Regression | Patient<br>safety<br>routines               | Safe care              | Processual<br>measures | -0.011<br>(-0.058 -<br>0.036)  | -0.006<br>(-0.049 -<br>0.037)  | -0.022<br>(-0.072 -<br>0.028)  |
| 1a -<br>Classical<br>OLS<br>Regression | Care<br>coordination<br>routines            | Safe care              | Processual<br>measures | 0.002 (-0.045<br>- 0.048)      | -0.005<br>(-0.048 -<br>0.039)  | -0.02 (-0.066<br>- 0.026)      |
| 1a -<br>Classical<br>OLS<br>Regression | Medication<br>review<br>routines            | Safe care              | Processual<br>measures | 0.005 (-0.041<br>- 0.052)      | 0.004 (-0.038<br>- 0.047)      | -0.002<br>(-0.047 -<br>0.043)  |
| 1a -<br>Classical<br>OLS<br>Regression | Availability<br>of exercise<br>and activity | Activity               | Processual<br>measures | 0.083 (0.035<br>- 0.131)       | 0.078 (0.033<br>- 0.122)       | 0.108 (0.06 -<br>0.156)        |
| 1a -<br>Classical<br>OLS<br>Regression | Private<br>ownership                        | Ownership              | Structural<br>measures | 0.024 (-0.024<br>- 0.072)      | 0.015 (-0.03 -<br>0.06)        | 0.028 (-0.018<br>- 0.074)      |
| 1a -<br>Classical<br>OLS<br>Regression | Size of<br>nursing<br>home                  | Size                   | Structural<br>measures | -0.197<br>(-0.241 -<br>-0.154) | -0.176<br>(-0.217 -<br>-0.135) | -0.181<br>(-0.226 -<br>-0.136) |
| 1a -<br>Classical<br>OLS<br>Regression | Nurses per<br>resident                      | Staffing               | Structural<br>measures | 0.043 (-0.006<br>- 0.091)      | 0.039 (-0.007<br>- 0.085)      | 0.011 (-0.036<br>- 0.057)      |
| 1a -<br>Classical<br>OLS<br>Regression | Staff per<br>resident                       | Staffing               | Structural<br>measures | 0.066 (0.02 -<br>0.111)        | 0.087 (0.044<br>- 0.13)        | 0.069 (0.023<br>- 0.115)       |
| 1a -<br>Classical<br>OLS<br>Regression | Staff with<br>adequate<br>education         | Staffing               | Structural<br>measures | 0.054 (0.005<br>- 0.103)       | 0.067 (0.022<br>- 0.112)       | 0.059 (0.013<br>- 0.106)       |
| 1a -<br>Classical<br>OLS<br>Regression | Has general<br>care<br>facilities           | NA                     | NA                     | -0.036<br>(-0.084 -<br>0.011)  | NA                             | NA                             |

|                                                                                          |                                          |                        |                        |                           |                           |                               |
|------------------------------------------------------------------------------------------|------------------------------------------|------------------------|------------------------|---------------------------|---------------------------|-------------------------------|
| 1a -<br>Classical<br>OLS<br>Regression                                                   | Has<br>dementia<br>care<br>facilities    | NA                     | NA                     | 0.032 (-0.014<br>- 0.079) | NA                        | NA                            |
| 1a -<br>Classical<br>OLS<br>Regression                                                   | Has assisted<br>living<br>facilities     | NA                     | NA                     | 0.027 (-0.009<br>- 0.064) | NA                        | NA                            |
| 1a -<br>Classical<br>OLS<br>Regression                                                   | Aggregate<br>Self-Rated<br>Health        | NA                     | NA                     | 0.363 (0.318<br>- 0.409)  | NA                        | NA                            |
| 1b - Mixed-<br>Effects<br>regression<br>with<br>Municipal-<br>level control<br>variables | Participation<br>in resident<br>councils | Individualized<br>care | Processual<br>measures | 0.069 (0.017<br>- 0.117)  | 0.051 (0.005<br>- 0.094)  | 0.062 (0.01 -<br>0.109)       |
| 1b - Mixed-<br>Effects<br>regression<br>with<br>Municipal-<br>level control<br>variables | Individualized<br>action plans           | Individualized<br>care | Processual<br>measures | 0.071 (0.021<br>- 0.12)   | 0.085 (0.039<br>- 0.131)  | 0.071 (0.026<br>- 0.116)      |
| 1b - Mixed-<br>Effects<br>regression<br>with<br>Municipal-<br>level control<br>variables | Meal-related<br>routines and<br>plans    | Individualized<br>care | Processual<br>measures | 0.072 (0.016<br>- 0.119)  | 0.078 (0.029<br>- 0.121)  | 0.054 (0 -<br>0.104)          |
| 1b - Mixed-<br>Effects<br>regression<br>with<br>Municipal-<br>level control<br>variables | Patient<br>safety<br>routines            | Safe care              | Processual<br>measures | 0.014 (-0.033<br>- 0.065) | 0.017 (-0.028<br>- 0.064) | -0.012<br>(-0.061 -<br>0.037) |
| 1b - Mixed-<br>Effects<br>regression<br>with<br>Municipal-<br>level control<br>variables | Care<br>coordination<br>routines         | Safe care              | Processual<br>measures | 0.029 (-0.023<br>- 0.079) | 0.021 (-0.026<br>- 0.067) | -0.002 (-0.05<br>- 0.052)     |
| 1b - Mixed-<br>Effects<br>regression<br>with<br>Municipal-<br>level control<br>variables | Medication<br>review<br>routines         | Safe care              | Processual<br>measures | 0.026 (-0.021<br>- 0.075) | 0.024 (-0.024<br>- 0.073) | 0.002 (-0.051<br>- 0.049)     |

|                                                                      |                                       |           |                     |                          |                          |                          |
|----------------------------------------------------------------------|---------------------------------------|-----------|---------------------|--------------------------|--------------------------|--------------------------|
| 1b - Mixed-Effects regression with Municipal-level control variables | Availability of exercise and activity | Activity  | Processual measures | 0.114 (0.067 - 0.17)     | 0.109 (0.064 - 0.153)    | 0.122 (0.072 - 0.17)     |
| 1b - Mixed-Effects regression with Municipal-level control variables | Private ownership                     | Ownership | Structural measures | 0.078 (0.026 - 0.128)    | 0.064 (0.008 - 0.118)    | 0.064 (0.016 - 0.113)    |
| 1b - Mixed-Effects regression with Municipal-level control variables | Size of nursing home                  | Size      | Structural measures | -0.184 (-0.232 - -0.139) | -0.159 (-0.204 - -0.117) | -0.153 (-0.195 - -0.102) |
| 1b - Mixed-Effects regression with Municipal-level control variables | Nurses per resident                   | Staffing  | Structural measures | 0.071 (0.022 - 0.117)    | 0.063 (0.018 - 0.113)    | 0.031 (-0.017 - 0.077)   |
| 1b - Mixed-Effects regression with Municipal-level control variables | Staff per resident                    | Staffing  | Structural measures | 0.056 (0.009 - 0.106)    | 0.072 (0.025 - 0.115)    | 0.06 (0.017 - 0.105)     |
| 1b - Mixed-Effects regression with Municipal-level control variables | Staff with adequate education         | Staffing  | Structural measures | 0.052 (0.003 - 0.104)    | 0.065 (0.021 - 0.113)    | 0.061 (0.015 - 0.106)    |
| 1b - Mixed-Effects regression with Municipal-level control variables | Has general care facilities           | NA        | NA                  | -0.054 (-0.101 - -0.011) | NA                       | NA                       |
| 1b - Mixed-Effects regression with Municipal-level control variables | Has dementia care facilities          | NA        | NA                  | 0.047 (0 - 0.094)        | NA                       | NA                       |

|                                                                      |                                |    |    |                        |    |    |
|----------------------------------------------------------------------|--------------------------------|----|----|------------------------|----|----|
| 1b - Mixed-Effects regression with Municipal-level control variables | Has assisted living facilities | NA | NA | 0.019 (-0.032 - 0.067) | NA | NA |
| 1b - Mixed-Effects regression with Municipal-level control variables | Aggregate Self-Rated Health    | NA | NA | 0.354 (0.312 - 0.397)  | NA | NA |

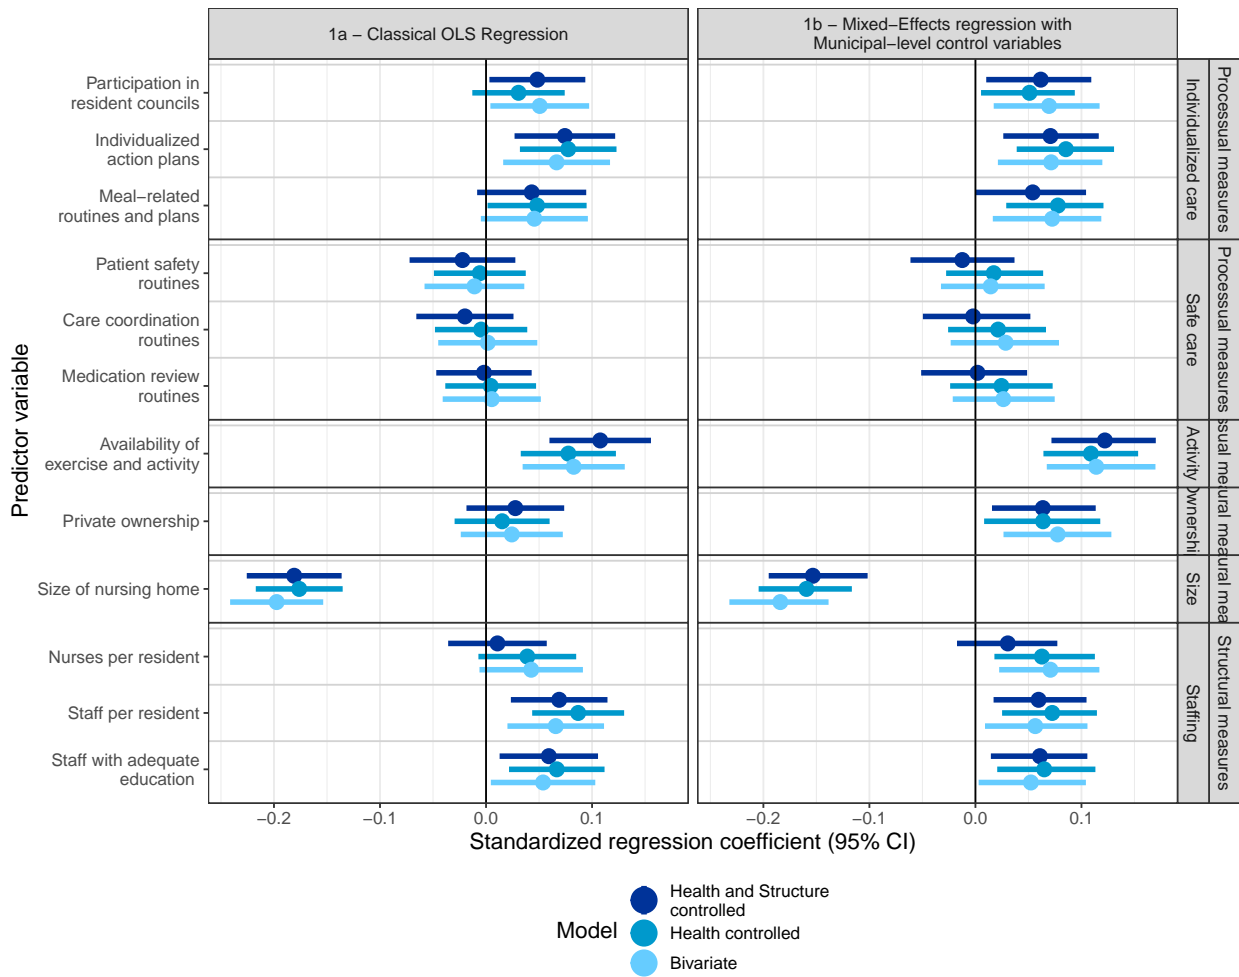

These results are discussed in detail in the manuscript. Lets also go ahead and print out the full list of model coefficients for the full multi-level model including municipal level controls. Note that these differ slightly from the data reported in the manuscript - We chose to control for confounding effects in a somewhat more restricted manner than simply including every predictor in a multivariable model.



|                 |        | 2.5 %  | 97.5 % |
|-----------------|--------|--------|--------|
| (Intercept)     | 0.014  | -0.041 | 0.074  |
| residentcouncil | 0.035  | -0.016 | 0.083  |
| actionplan      | 0.044  | -0.011 | 0.098  |
| meals           | 0.027  | -0.034 | 0.080  |
| safetyroutines  | -0.042 | -0.093 | 0.015  |
| carecoord       | -0.008 | -0.067 | 0.051  |
| medreview       | -0.006 | -0.070 | 0.045  |
| activity        | 0.110  | 0.061  | 0.163  |
| private         | 0.036  | -0.015 | 0.092  |
| size            | -0.168 | -0.215 | -0.121 |
| rns             | 0.029  | -0.018 | 0.080  |
| staff           | 0.055  | 0.010  | 0.105  |
| edu             | 0.056  | 0.008  | 0.101  |
| typegen         | -0.032 | -0.085 | 0.017  |
| typedem         | 0.061  | 0.009  | 0.114  |
| typeserv        | 0.019  | -0.047 | 0.086  |
| srhtot          | 0.345  | 0.300  | 0.389  |
| pop65innh       | -0.033 | -0.096 | 0.031  |
| pop65           | 0.049  | -0.024 | 0.118  |
| popkm           | -0.011 | -0.108 | 0.096  |
| costperpt       | -0.011 | -0.076 | 0.049  |
| nhage           | 0.096  | 0.040  | 0.155  |
| polcontrol      | 0.068  | -0.007 | 0.145  |
| taxpower        | -0.083 | -0.156 | -0.008 |

## Post-hoc analyses

### Non-linear effects

While we chose to assume linearity in our reported models to provide a more intuitive interpretation of our results, we did assess for non-linear effects using restricted cubic splines with interesting results. Since we're only interested in the form of the spline, and not the absolute effect of the variable here, we can load all of our variables into a single model for ease of analysis.

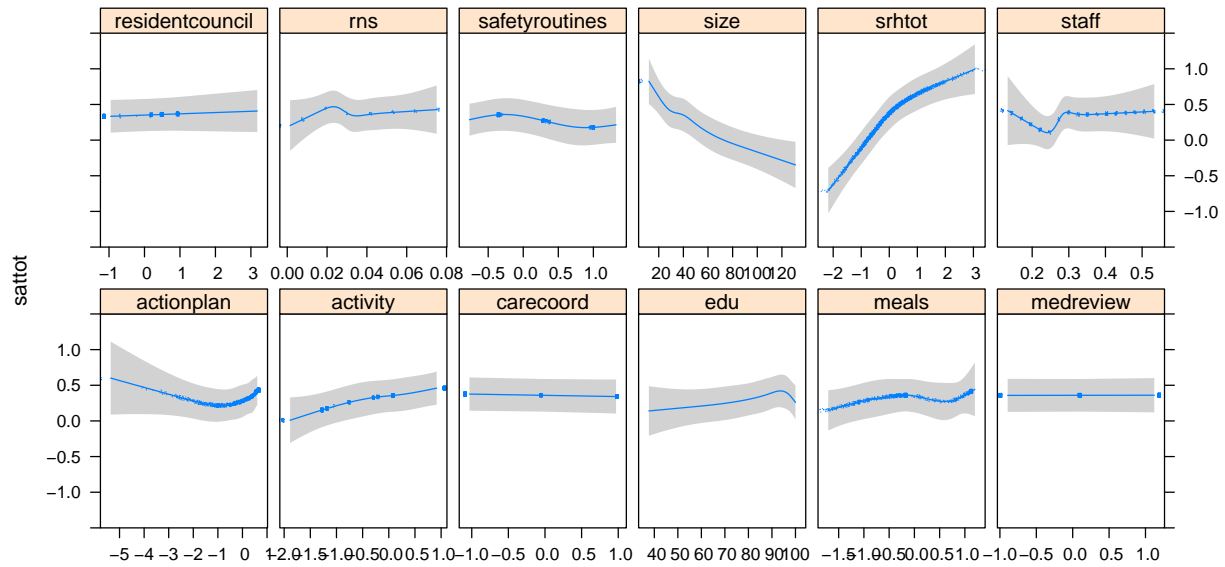

We see that some variables display interesting patterns using this technique. Some are not readily interpretable, but two in particular stand out as candidates for further investigation, namely the variables for staff education and non-nurse staffing levels:

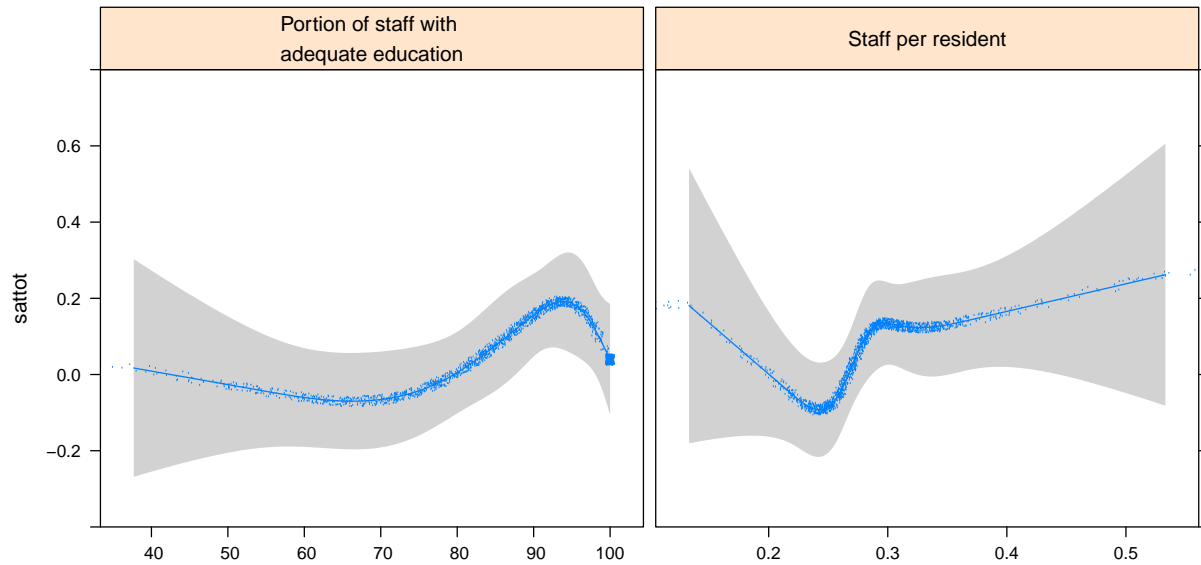

Here we see that for staff education, satisfaction drops from a peak around 94% with an “adequate” level of training to a lower level of satisfaction for sites reporting 100% “adequately educated” staff. We also see some suggestion of a threshold effect for staffing levels, with diminishing returns after increasing staffing ratios beyond 0.3 staff per resident. These effects are not quite significant, and performing detailed post hoc analysis is likely to lead to high “researcher degrees of freedom” - as such we leave these findings to be pursued in further research.

## Mediation analysis

To investigate potential mediation effects at the nursing home level, we performed an analysis of average causal mediation effects (ACME) between each of the process and structure measures.

| measure | mediator        | est    | low     | high   | p    |
|---------|-----------------|--------|---------|--------|------|
| size    | residentcouncil | -0.036 | -0.071  | -0.014 | 0.02 |
| size    | actionplan      | -0.017 | -0.039  | -0.004 | 0.02 |
| size    | meals           | -0.026 | -0.058  | -0.003 | 0.00 |
| size    | safetyroutines  | -0.001 | -0.013  | 0.013  | 0.90 |
| size    | carecoord       | -0.006 | -0.028  | 0.014  | 0.40 |
| size    | medreview       | -0.002 | -0.019  | 0.015  | 0.76 |
| size    | activity        | -0.095 | -0.170  | -0.051 | 0.00 |
| staff   | residentcouncil | -0.092 | -0.505  | 0.015  | 0.08 |
| staff   | actionplan      | 0.001  | -0.197  | 0.123  | 0.98 |
| staff   | meals           | 0.002  | -0.075  | 0.111  | 0.80 |
| staff   | safetyroutines  | 0.003  | -0.087  | 0.058  | 0.96 |
| staff   | carecoord       | -0.003 | -0.081  | 0.046  | 0.84 |
| staff   | medreview       | -0.002 | -0.118  | 0.078  | 0.86 |
| staff   | activity        | -0.110 | -1.429  | 0.102  | 0.14 |
| rns     | residentcouncil | 0.055  | -0.453  | 0.342  | 0.28 |
| rns     | actionplan      | 0.112  | -0.750  | 1.163  | 0.22 |
| rns     | meals           | 0.147  | -1.535  | 1.427  | 0.24 |
| rns     | safetyroutines  | -0.034 | -0.545  | 0.208  | 0.58 |
| rns     | carecoord       | -0.017 | -0.465  | 0.756  | 0.86 |
| rns     | medreview       | -0.020 | -0.363  | 0.782  | 0.82 |
| rns     | activity        | 0.232  | -2.582  | 0.928  | 0.16 |
| edu     | residentcouncil | -0.008 | -0.111  | 0.113  | 0.74 |
| edu     | actionplan      | 0.089  | 0.016   | 0.509  | 0.04 |
| edu     | meals           | 0.011  | -0.022  | 0.078  | 0.58 |
| edu     | safetyroutines  | 0.001  | -0.073  | 0.045  | 0.94 |
| edu     | carecoord       | -0.002 | -0.083  | 0.158  | 0.96 |
| edu     | medreview       | 0.000  | -0.024  | 0.078  | 0.88 |
| edu     | activity        | 0.005  | -0.142  | 0.115  | 0.96 |
| private | residentcouncil | 0.580  | -11.347 | 4.554  | 0.42 |
| private | actionplan      | 0.523  | -6.216  | 4.229  | 0.28 |
| private | meals           | 0.635  | -5.092  | 5.022  | 0.28 |
| private | safetyroutines  | -0.355 | -4.837  | 3.242  | 0.46 |
| private | carecoord       | -0.073 | -2.342  | 2.024  | 0.98 |
| private | medreview       | -0.100 | -5.205  | 0.796  | 0.72 |
| private | activity        | 1.238  | -5.673  | 11.879 | 0.38 |

We see that by and large, the mediating effects in this data are quite weak, as may be expected in a dataset such as this with quite weak overall effects. Let's filter this using a p-value of 0.05 as a cutoff and plot the results:

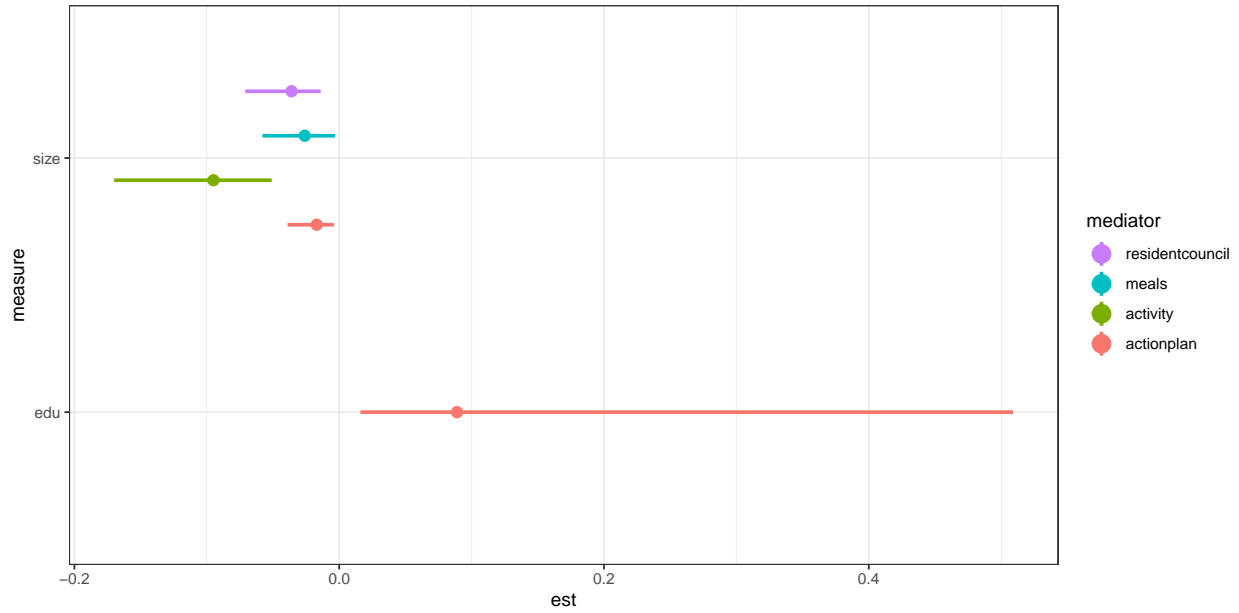

We found significant mediating effects with regards to nursing home size, with the most pronounced effects found with regards to exercise and activity. This suggests that the negative effect on satisfaction of larger nursing homes is to some extent mediated by the provision of more activities and individualized care processes - in other words, larger nursing homes provide more activities, explaining the increase in importance of the activity variable upon controlling for structural variables.

### Associations with size

As it was thought that there may be important differences with regards to conditions across various sizes of nursing homes, we investigated the average values of the analytical and control variables across various sizes of nursing homes, here binned by quintiles (i.e. 5 groups):

|                                                     | 1        | 2        | 3        | 4        | 5        |
|-----------------------------------------------------|----------|----------|----------|----------|----------|
| N                                                   | 345      | 347      | 373      | 360      | 367      |
| Size range                                          | 8 - 25   | 26 - 33  | 34 - 42  | 43 - 56  | 57 - 176 |
| Participation in resident councils                  | -0.102   | -0.023   | 0.043    | 0.067    | 0.180    |
| Individualized action plans                         | -0.085   | 0.002    | -0.013   | 0.034    | 0.059    |
| Meal-related routines and plans                     | -0.093   | -0.058   | 0.004    | 0.145    | 0.130    |
| Patient safety routines                             | -0.035   | -0.054   | 0.024    | 0.045    | 0.113    |
| Care coordination routines                          | 0.013    | -0.105   | -0.006   | 0.050    | 0.133    |
| Medication review routines                          | -0.012   | -0.093   | 0.067    | 0.032    | 0.124    |
| Availability of exercise and activity               | -0.064   | -0.103   | 0.014    | 0.178    | 0.220    |
| Private ownership                                   | 0.142    | 0.147    | 0.166    | 0.242    | 0.240    |
| Size of nursing home                                | 20.322   | 29.548   | 38.091   | 49.089   | 78.850   |
| Nurses per resident                                 | 0.035    | 0.033    | 0.034    | 0.032    | 0.031    |
| Staff per resident                                  | 0.294    | 0.288    | 0.296    | 0.284    | 0.277    |
| Staff with adequate education                       | 82.838   | 84.693   | 83.689   | 84.038   | 83.323   |
| Has general care facilities                         | 0.739    | 0.755    | 0.788    | 0.833    | 0.815    |
| Has dementia care facilities                        | 0.449    | 0.519    | 0.579    | 0.694    | 0.711    |
| Has assisted living facilities                      | 0.032    | 0.046    | 0.062    | 0.044    | 0.084    |
| Aggregate Self-Rated Health                         | 0.118    | 0.057    | -0.019   | -0.035   | -0.052   |
| Population 65+ in Nursing Home (%)                  | 4.128    | 4.216    | 4.216    | 4.242    | 4.264    |
| Population 65+ (%)                                  | 22.378   | 22.151   | 21.466   | 20.646   | 19.630   |
| Population per square kilometer                     | 291.133  | 288.278  | 347.298  | 642.971  | 757.960  |
| Average annual cost per resident (SEK)              | 856804.5 | 835606.0 | 848870.4 | 832273.1 | 815463.9 |
| Average age of residents in nursing homes           | 83.776   | 83.414   | 83.504   | 83.463   | 83.329   |
| Political control (left = -1, mixed = 0, right = 1) | -0.157   | -0.101   | -0.075   | -0.142   | -0.131   |
| Average annual per capita taxable income (SEK)      | 182433.4 | 183177.8 | 187857.9 | 190768.6 | 196218.7 |

As seen also in the mediation analysis, we find that larger homes tend to report better process-related quality, though no major differences can be seen in terms of the structural variables. Larger nursing homes tend to be more privately owned, and have lower levels of self-rated health.

### Associations of user questions with composite measure

As it was thought that there may be specific questions which may deviate from the overall composite score, we generated descriptive statistics regarding the distribution of each included question by quantiles of the composite measure:

|           | 1             | 2            | 3           | 4           | 5          |
|-----------|---------------|--------------|-------------|-------------|------------|
| N         | 359           | 359          | 358         | 359         | 359        |
| sat range | -3.93 - -0.81 | -0.81 - -0.2 | -0.2 - 0.33 | 0.33 - 0.85 | 0.85 - 2.4 |
| user5     | 63.650        | 71.457       | 74.947      | 79.219      | 85.235     |
| user6     | 50.122        | 60.369       | 65.655      | 72.261      | 81.358     |
| user7     | 51.862        | 59.624       | 66.537      | 71.463      | 79.727     |
| user8     | 64.773        | 72.396       | 76.582      | 81.451      | 87.346     |
| user9     | 55.997        | 65.791       | 70.827      | 76.356      | 84.146     |
| user10    | 59.020        | 69.346       | 74.326      | 79.878      | 86.991     |
| user11    | 35.707        | 43.344       | 49.424      | 57.332      | 66.799     |
| user12    | 46.161        | 56.451       | 62.471      | 69.260      | 77.801     |
| user13    | 88.037        | 93.404       | 95.409      | 97.135      | 98.369     |
| user14    | 66.381        | 77.069       | 80.708      | 85.899      | 90.991     |
| user16    | 79.274        | 86.249       | 89.732      | 93.056      | 96.474     |
| user17    | 76.234        | 84.537       | 88.380      | 91.986      | 95.784     |
| user18    | 47.654        | 55.516       | 63.390      | 69.946      | 78.335     |
| user19    | 42.770        | 51.781       | 58.211      | 65.161      | 75.736     |
| user21    | 66.289        | 73.910       | 77.693      | 80.809      | 88.435     |
| user22    | 46.287        | 52.536       | 58.114      | 61.979      | 72.068     |
| user23    | 74.320        | 82.155       | 86.107      | 89.730      | 94.491     |
| user24    | 69.944        | 78.929       | 84.420      | 89.014      | 93.983     |
| user25    | 38.368        | 43.570       | 46.632      | 50.624      | 56.499     |
| user27    | 76.997        | 85.647       | 88.964      | 92.692      | 96.069     |

### Sub-group analysis - Questionnaire completion

Due to the high rate of missingness for question 26 (“Who completed the questionnaire?”), we could not include this quite interesting data in our main analysis. The NBHW reported data for this question only for nursing home units with more than 7 responses, and as such, only 16% of nursing homes had data for this variable. This is far from sufficient to base reliable inference on, and we know that this missingness is associated with a factor (size) which is associated with resident satisfaction. Nonetheless, a quick look at the distribution of these data may be enlightening. Overall among nursing homes reporting data, 14.4% of questionnaires were filled out by the residents themselves, 22.5% had assistance filling out the survey, and 63.2% of questionnaires were filled out by somebody other than the user themselves. This high proportion of questionnaires completed by third parties is disquieting.

In a simple bivariate model, completion of the user survey by the resident themselves (with or without help) is associated with higher satisfaction scores (standardized beta coefficient of 0.12, 95% CI 0.01 - 0.22). Unfortunately, the NBHW does not report data on who the third party completing the questionnaire is - It is plausible that relatives completing the questionnaire are harsher in their judgements than the residents alone would be. Let’s have a look as what predictors are associated with the resident themselves filling out the questionnaire with or without help:

|                 | Effect | Lower 0.95 | Upper 0.95 |
|-----------------|--------|------------|------------|
| residentcouncil | 0.157  | 0.000      | 0.315      |
| actionplan      | 0.053  | -0.037     | 0.143      |
| meals           | -0.005 | -0.164     | 0.154      |
| safetyroutines  | 0.062  | -0.096     | 0.220      |
| carecoord       | 0.017  | -0.236     | 0.269      |
| medreview       | -0.117 | -0.351     | 0.116      |
| activity        | 0.132  | -0.006     | 0.271      |
| private         | -0.043 | -0.135     | 0.049      |
| size            | -0.402 | -2.481     | 1.677      |
| rms             | -0.001 | -0.002     | 0.001      |
| staff           | -0.010 | -0.015     | -0.005     |
| edu             | -1.135 | -2.875     | 0.606      |
| typegen         | 0.234  | 0.113      | 0.355      |
| typedem         | -0.112 | -0.217     | -0.007     |
| typeserv        | 0.194  | 0.118      | 0.269      |
| srhtot          | 0.298  | 0.098      | 0.497      |
| userresponse    | 0.038  | 0.016      | 0.059      |

Given the low sample size, we see few robust effects. Among our process and structure variables, resident councils and activities appeared to have a positive association with self-completion, while staffing ratio appears to have a weak association with the percentage of questionnaires filled out by the resident - homes with higher staffing ratios to a greater extent are associated with surveys being completed by third parties. Among control variables, General care and short-term facilities have higher rates of resident completed surveys, while dementia facilities have lower rates. As may be expected, self rated health was positively correlated with self-completion of the survey, as was the response rate to they survey itself.

## Alternate models

As in any secondary analysis of data, a number of decisions have been made in executing the analysis. Here, we present a set of analyses to explore possible alternative choices and evaluate the sensitivity of our findings to alternate methodologies. In addition to the additional analyses we present here, we also provide an interactive tool with which readers may specify alternate sets of weights for each question in the user survey, allowing permitting the exploration of the sensitivity of our findigngs to alteranate outcome specifictations.

Kajonius & Kazemi (2016) chose for instance to analyze the user survey using question 24 (relating to the users overall satisfaction with nursing home care) as the dependant variable. Lets go ahead and take a look at what our results would look like if we had taken that route. (Note that there are problems with the distribution of residuals with this approach given the skewed distribution of individual questions, with a significant portion of nursing homes having 100% of their residents report positive overall satisfaction)

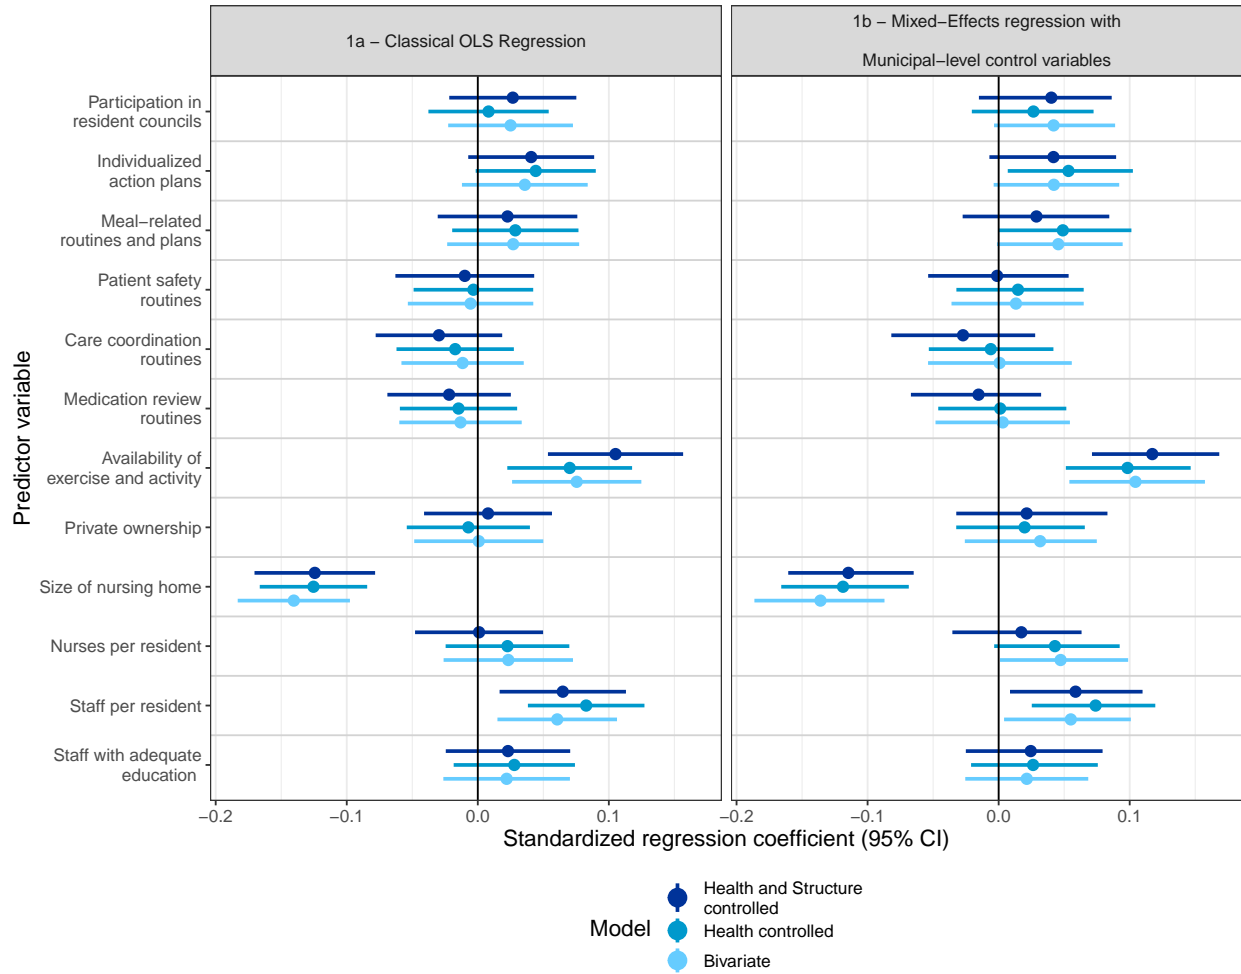

We see that using only question 24 as the outcome, the results are quite a bit weaker. In this reading, only physical activity, the size of the nursing home, and the ratio of staff per resident are significant at the  $p < 0.05$  level.

We can also check to see if the larger number of small homes might be “washing out” effects relevant to a larger number of individual patients by weighting our data by the size of the nursing home. Note that we report only the OLS model, as lme4 had some difficulty generating appropriate confidence intervals for weighted observations. We welcome more talented programmers than ourselves to pursue this issue.



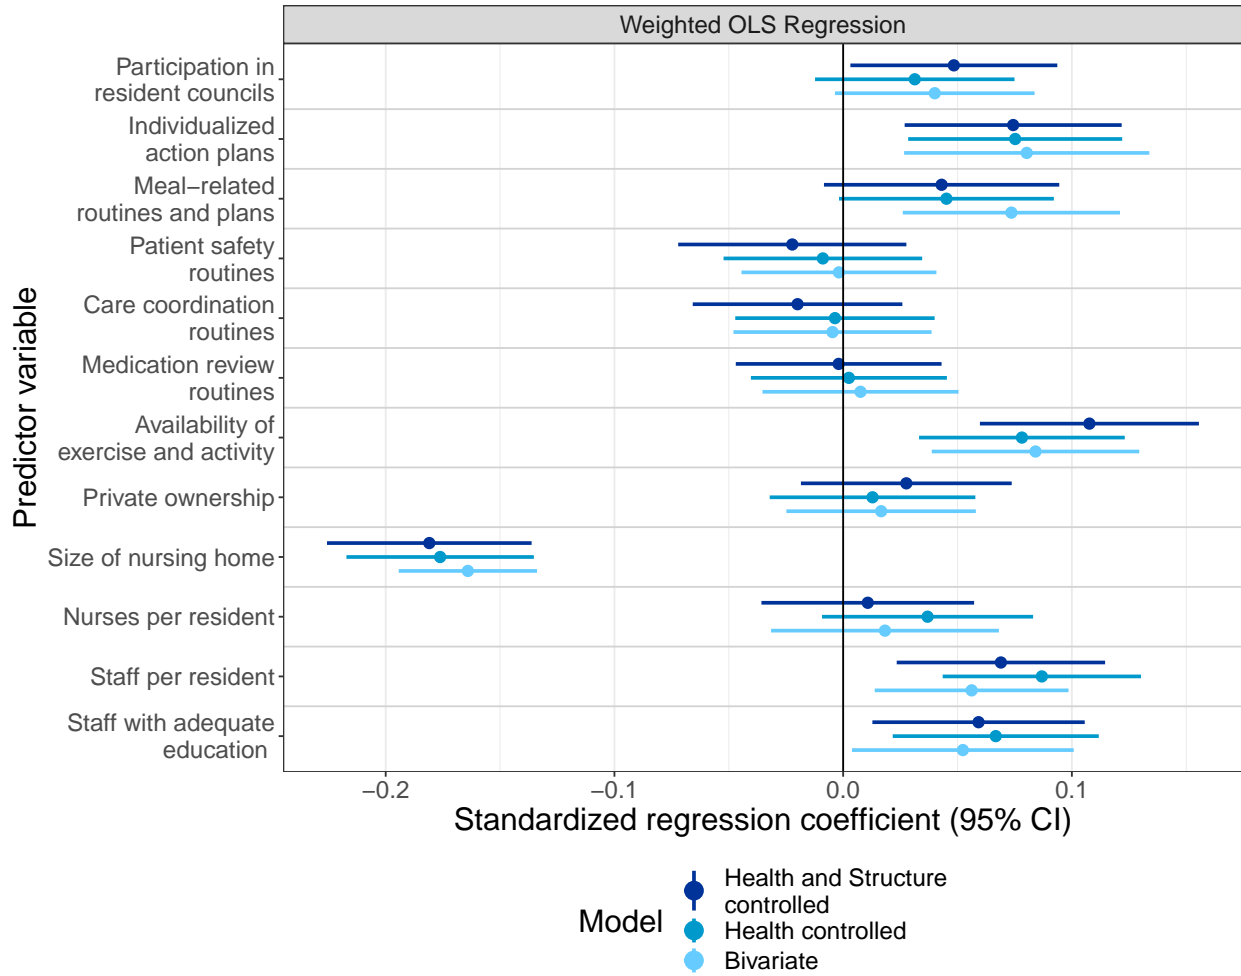

We find similar results as compared with our standard OLS regression model.

While we chose to apply a random effects model to control for municipal level effects, another alternative would be to include an indicator for municipality as a fixed effect. Doing so produces the following results:

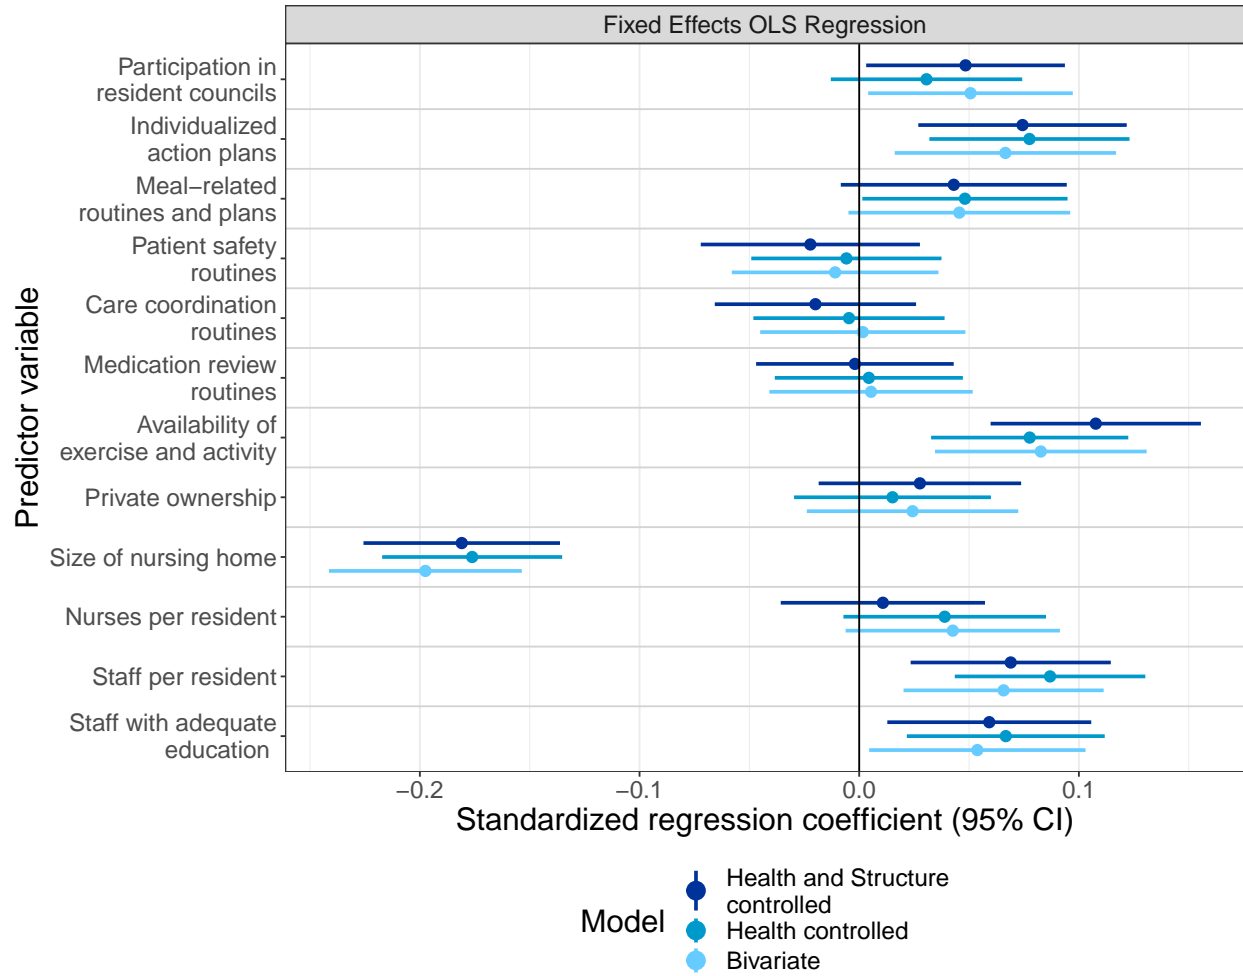

Supplement: 12913_2019_4694_MOESM1_ESM.pdf [file 12913_2019_4694_MOESM1_ESM.pdf]
